# Supplementary material
Source: PubMed Central journal article supplement (PMC4618085)
Supplement: NIHMS715326-supplement-supplemental_material.pdf [file NIHMS715326-supplement-supplemental_material.pdf]

**SUPPLEMENTAL MATERIAL**

## **SUPPLEMENTAL METHODS**

### **ICD9 codes used to define prevalent comorbid conditions**

| <b><u>Comorbid condition</u></b> | <b><u>ICD9 code</u></b>           |
|----------------------------------|-----------------------------------|
| Hypertension                     | 401-405                           |
| Diabetes mellitus                | 250.x                             |
| Myocardial infarction            | 410-410.9, 412                    |
| Angina                           | 411, 413                          |
| CAD                              | 414.0, 414.8, 414.9               |
| PCI                              | 36.03, 36.04, 36.06, 36.07, 36.09 |
| CABG                             | 36.10-36.17, 36.19                |
| CHF                              | 428-428.9                         |

|                             |                                                                                  |
|-----------------------------|----------------------------------------------------------------------------------|
| Peripheral arterial disease | 440.0-440.9, 443, 443.x, 38.0, 38.1, 39.50,<br>39.22, 39.24, 39.25, 39.26, 39.28 |
| Cerebrovascular disease     | 430-438                                                                          |
| Chronic lung disease        | 490-496, 500-505, 506.4                                                          |
| Dementia                    | 290-290.9                                                                        |
| Rheumatologic disease       | 710.0, 710.1, 710.4, 714.0-714.2,<br>714.81, 725                                 |
| Peptic ulcer disease        | 531-534.9, 531.4-531.7, 532.4-532.7,<br>533.4-533.7, 534.4-534.7                 |
| Liver disease               | 571.x, 572.x, 456.0-456.21                                                       |
| Hemiplegia or paraplegia    | 344.1, 342-342.9                                                                 |
| Malignancy                  | 140-172.9, 174-195.8, 200-208.9, 196-199.1                                       |
| HIV/AIDS                    | 042, V08, 795.71                                                                 |

Depression

296.x

---

CAD, coronary artery disease; PCI, percutaneous coronary intervention; CABG, coronary artery bypass grafting; CHF, congestive heart failure

## ICD9 codes used to define incident clinical events

| <u>Incident event</u>       | <u>ICD9 code</u>                  |
|-----------------------------|-----------------------------------|
| Acute myocardial infarction | 410.x                             |
| PCI                         | 36.03, 36.04, 36.06, 36.07, 36.09 |
| CABG                        | 36.10-36.17, 36.19                |
| Ischemic stroke             | 433.x, 434.x, 436.x               |

---

PCI, percutaneous coronary intervention; CABG, coronary artery bypass grafting

**Procedure (CPT) codes used to define coronary interventions**

| <b><u>Coronary intervention</u></b> | <b><u>CPT code</u></b>                                                                                      |
|-------------------------------------|-------------------------------------------------------------------------------------------------------------|
| PCI                                 | 92980 92981 92982 92984 92985 92986 92987 92988<br>92989 92990 92991 92992 92993 92994 92995 92996          |
| CABG                                | 33510 33511 33512 33513 33514 33515 33516 33517<br>33518 33519 33521 33522 33523 33533 33534 33535<br>33536 |

---

PCI, percutaneous coronary intervention; CABG, coronary artery bypass grafting

### **Area-based socio-economic indicators**

The Area Health Resources Files (AHRF, <http://ahrf.hrsa.gov/>) system is issued by the National Center for Health Workforce Analysis, Bureau of Health Workforce, Health Resources and Services Administration.

Within the AHRF, we used select **2004 County Typology Codes** from the Economic Research Service (ERS), U.S. Department of Agriculture, [www.ers.usda.gov](http://www.ers.usda.gov). The 2004 County Typology Codes were developed for all 3,141 counties, county equivalents, and independent cities in the United States.

*-Housing stress:* 30 percent or more of households had one or more of these housing conditions in 2000: lacked complete plumbing, lacked complete kitchen, paid 30 percent or more of income for owner costs or rent, or had more than 1 person per room.

*-Low-education:* 25 percent or more of residents 25 through 64 years old had neither a high school diploma nor GED in 2000.

*-Low-employment:* Less than 65 percent of residents 21 through 64 years old were employed in 2000.

*-Persistent poverty:* 20 percent or more of residents were poor as measured by each of the last 4 censuses: 1970, 1980, 1990 and 2000.

## **Methods used in analyses of NHANES data**

### *Survey design and data collection*

The NHANES is conducted by the National Center for Health Statistics and implements a stratified multistage probability design to obtain a representative sample of the civilian, non-institutionalized U.S. population. Details on the sampling strategy and weighting methods are available in electronic form (2). Baseline data were linked to the National Center for Health Statistics mortality follow-up file. Mortality status was ascertained by matching National Death Index screen from the time of survey until 31 December 2006. Cause of death was coded using ICD-10 codes. (3). Using special mobile examination centers, the NHANES conducts household interviews and collects sociodemographic and clinical information, standardized physical examinations including height, weight and blood pressure, and a collection of blood samples. Because NHANES data are publicly available and subjects are de-identified the project was exempt from IRB review.

Data for our study were drawn from NHANES 1999-2004, which included a sample of approximately 31,126 persons from randomly selected U.S. locations. The study population was restricted to adult participants, self-reported as non-Hispanic white or African American, age  $\geq$  18 years at the time of interview (n=11,634). Participants with non-positive sample weights were excluded (n=863). The final study cohort was comprised of 10,771 participants.

### *Study Variables*

Variables included: age (years), estimated GFR (ml/min/1.73m<sup>2</sup>), gender, BMI (kg/m<sup>2</sup>), SBP (mmHg), DBP (mmHg), income (above/below 200% federal poverty level), marital status



(married, widowed, divorced, single) and prevalence rates of hypertension, diabetes, hypercholesterolemia, and history of CHD, CHF, stroke, heart attack, and liver disease.

### *Statistical analyses*

Study population characteristics were described overall by race/ethnicity, respectively, using mean and standard deviation for continuous variables and proportions for categorical variables. All estimates were weighted to adjust for the differential probabilities of sampling and non-response, to represent the total civilian, non-institutionalized US population. Estimates derived from a sample size smaller than the recommended lower limit in the NHANES analytic guidelines were considered unreliable<sup>1</sup>. Regression analyses based on the Cox proportional hazards model were used to obtain hazard rates comparing race/ethnicity for all-cause mortality, CV and cerebrovascular mortality (derived from ICD 10 codes). Model 1: unadjusted; model 2: adjusted for age, gender, baseline estimated glomerular filtration rate; model 3: adjusted for model 2 variables plus comorbidities; model 4: adjusted for model 3 variables plus baseline body mass index; and model 5: adjusted for model 4 variables plus mean income and marital status. Analyses for mortality were repeated in participants with eGFR  $\geq 60$  ml/min/1.73m<sup>2</sup>, in in participants categorized by baseline age (18-49 vs.  $\geq 50$  years old), gender (male vs. female) and poverty level (above/below 200% federal poverty level). All analyses were performed with SAS v 9.3 (Research Triangle Park, NC), a statistical package that adjusts all estimates for the complex NHANES survey design. Because the observations contributed by each participant in the sample were weighted for the differential probabilities of selection and non-response, actual sample sizes are not reported along with percentages.

## References

1. Duru OK, Harawa NT, Kermah D, Norris KC. Allostatic load burden and racial disparities in mortality. *Journal of the National Medical Association*. Jan-Feb 2012;104(1-2):89-95.
2. Centers for Disease Control and Prevention (CDC). National Center for Health Statistics (NCHS). National Health and Nutrition Examination Survey Analytic Guidelines. Hyattsville, MD: U.S. Department of Health and Human Services, Centers for Disease Control and Prevention, [1999-2010][ [http://www.cdc.gov/nchs/data/series/sr\\_02/sr02\\_161.pdf](http://www.cdc.gov/nchs/data/series/sr_02/sr02_161.pdf)]
3. NHANES (1999–2004) Linked Mortality Files. Available: [http://www.cdc.gov/nchs/data\\_access/data\\_linkage/mortality/nhanes\\_99\\_04\\_linkage.htm](http://www.cdc.gov/nchs/data_access/data_linkage/mortality/nhanes_99_04_linkage.htm). Accessed April 10th, 2015.

**Supplemental Table 1. Baseline characteristics of a propensity matched cohort of 937,560 US veterans.**

|                                            | <b>Whites</b>          | <b>African-Americans</b> | <b>Standardized difference</b> |
|--------------------------------------------|------------------------|--------------------------|--------------------------------|
|                                            | <b>N=468,780</b>       | <b>N=468,780</b>         |                                |
| Age (years)                                | 54.5 ± 13.1            | 54.2 ± 14.3              | 0.02                           |
| Estimated GFR (ml/min/1.73m <sup>2</sup> ) | 91.7 ± 18.7            | 90.8 ± 15.5              | 0.05                           |
| Gender (males)                             | 424,545(91)            | 426,761 (91)             | 0.02                           |
| Hypertension                               | 294,985 (63)           | 291,979 (62)             | 0.01                           |
| DM                                         | 119,599 (26)           | 119,617 (26)             | -0.0                           |
| CHD                                        | 33,646 (7)             | 33,069 (7)               | 0.004                          |
| CHF                                        | 20,860 (4)             | 20,470 (4)               | 0.004                          |
| Cerebrovascular disease                    | 26,520 (6)             | 26,087 (6)               | 0.004                          |
| PAD                                        | 21,872 (5)             | 22,036 (5)               | -0.002                         |
| Chronic Lung disease                       | 71,903 (15)            | 71,450(15)               | 0.003                          |
| Dementia                                   | 3,975 (0.9)            | 4,005 (0.9)              | -0.001                         |
| Rheumatologic disease                      | 5,564 (1)              | 5,307 (1)                | 0.005                          |
| Peptic ulcer disease                       | 9,957 (2)              | 9,931 (2)                | 0.0                            |
| Liver disease                              | 5,885 (1)              | 6,000 (1)                | -0.002                         |
| Hemiplegia                                 | 2,777 (0.6)            | 2,733 (0.6)              | 0.001                          |
| Malignancies                               | 45,996 (10)            | 46,374 (10)              | -0.003                         |
| AIDS/HIV                                   | 9,239 (2)              | 6,413 (1)                | 0.05                           |
| Depression                                 | 49,844 (11)            | 50,643 (11)              | -0.006                         |
| Per capita income                          | 16,713 (10,084-29,348) | 16,744 (9,736-29,732)    | 0.02                           |
| Married                                    | 281,292 (60)           | 281,349 (60)             | -0.0                           |
| Service-connected                          | 232,190 (50)           | 235,786 (50)             | -0.02                          |
| BMI (kg/m <sup>2</sup> )                   | 29.0 ± 6.0             | 29.1 ± 5.9               | -0.01                          |
| SBP (mmHg)                                 | 136.8 ± 20.4           | 136.7 ± 19.7             | 0.004                          |
| DBP (mmHg)                                 | 80.0 ± 12.7            | 79.9 ± 12.1              | 0.007                          |
| ACEI/ARB use                               | 95,412 (20)            | 95,046 (20)              | 0.002                          |
| Statin use                                 | 44,033 (9)             | 43,054 (9)               | 0.007                          |
| Influenza vaccination                      | 120,887 (26)           | 120,215 (26)             | 0.003                          |
| Healthcare encounters >1/month             | 304,946 (65)           | 305,419 (65)             | -0.002                         |
| Living in area with high housing stress    | 219,950(47)            | 218,963 (47)             | 0.004                          |
| Living in area with low education          | 67,642 (14)            | 66,167 (14)              | 0.009                          |
| Living in area with low employment         | 50,827 (11)            | 49,478 (11)              | 0.009                          |
| Living in area of persistent poverty       | 34,008 (7)             | 32,682 (7)               | 0.01                           |

Data is presented as means  $\pm$  SD, medians (25-75 percentile) or number (% of total).

ACEI/ARB, angiotensin converting enzyme inhibitors/angiotensin receptor blockers; eGFR, estimated glomerular filtration rate; SBP, systolic blood pressure; DBP, diastolic blood pressure; DM, diabetes mellitus; CHD, coronary heart disease; CHF, chronic heart failure; PAD, peripheral arterial disease.

**Supplemental Table 2a. Baseline characteristics in the overall NHANES 1999-2004 sample**

|                                              | All<br>N=10771 | Whites<br>N=7545 (87) | African-<br>Americans<br>N=3226 (13) | p-value |
|----------------------------------------------|----------------|-----------------------|--------------------------------------|---------|
| Age (years)                                  | 46 ± 0.3       | 47 ± 0.3              | 42 ± 0.3                             | <0.0001 |
| Estimated<br>GFR(ml/min/1.73m <sup>2</sup> ) | 99 ± 0.7       | 97 ± 0.7              | 115 ± 1.4                            | <0.0001 |
| Gender (males)                               | 5167(48)       | 3630(48)              | 1537(44)                             | 0.0004  |
| Hypertension                                 | 4375(36)       | 3002(35)              | 1373(41)                             | 0.0002  |
| Diabetes                                     | 1181(9)        | 747(8)                | 434(12)                              | <0.0001 |
| High Cholesterol                             | 4816(49)       | 3639(50)              | 1177(42)                             | <0.0001 |
| CHD                                          | 508(4)         | 431(4)                | 77(2)                                | <0.0001 |
| CHF                                          | 358(3)         | 275(2)                | 83(2)                                | 0.8     |
| Stroke                                       | 393(3)         | 278(3)                | 115(3)                               | 0.07    |
| Heart attack                                 | 531(4)         | 428(4)                | 103(3)                               | 0.01    |
| Liver disease                                | 297(3)         | 240(3)                | 57(2)                                | 0.0003  |
| Below 200% poverty<br>level                  | 3940(31)       | 2360(28)              | 1580(53)                             | <0.0001 |
| Marital Status                               |                |                       |                                      |         |
| Married                                      | 6034(65)       | 4682(67)              | 1352(47)                             |         |
| Widowed                                      | 1097(7)        | 815(7)                | 282(7)                               |         |
| Divorced                                     | 937(9)         | 615(9)                | 322(12)                              |         |
| Single                                       | 2385(19)       | 1214(17)              | 1171(34)                             | <0.0001 |
| BMI (kg/m <sup>2</sup> )                     | 28 ± 0.1       | 28 ± 0.1              | 30 ± 0.2                             | <0.0001 |
| SBP (mmHg)                                   | 123 ± 0.4      | 123 ± 0.4             | 126 ± 0.5                            | <0.0001 |
| DBP(mmHg)                                    | 72 ± 0.2       | 71 ± 0.3              | 73 ± 0.4                             | 0.001   |

Data is presented as means ± SE, or number (weighted %)

**Supplemental Table 2b. Baseline characteristics in NHANES 1999-2004 participants with estimated glomerular filtration rate  $\geq 60$  ml/min/1.73m<sup>2</sup>**

|                                              | All<br>N=9257 | Whites<br>N=6481 (87) | African-<br>Americans<br>N=2776 (13) | p-value |
|----------------------------------------------|---------------|-----------------------|--------------------------------------|---------|
| Age (years)                                  | 45 $\pm$ 0.3  | 45 $\pm$ 0.3          | 41 $\pm$ 0.3                         | <0.0001 |
| Estimated<br>GFR(ml/min/1.73m <sup>2</sup> ) | 102 $\pm$ 0.7 | 100 $\pm$ 0.6         | 117 $\pm$ 1.4                        | <0.0001 |
| Gender (males)                               | 4498(49)      | 3167(49)              | 1331(44)                             | 0.0004  |
| Hypertension                                 | 3432(33)      | 2338(33)              | 1094(38)                             | 0.0004  |
| Diabetes                                     | 884(8)        | 549(7)                | 335(11)                              | <0.0001 |
| High Cholesterol                             | 4412(49)      | 3305(50)              | 1107(41)                             | <0.0001 |
| CHD                                          | 344(3)        | 291(3)                | 53(2)                                | <0.0001 |
| CHF                                          | 193(2)        | 149(2)                | 44(2)                                | 0.7     |
| Stroke                                       | 237(2)        | 174(2)                | 63(2)                                | 0.7     |
| Heart attack                                 | 356(3)        | 288(3)                | 68(2)                                | 0.01    |
| Liver disease                                | 244(3)        | 203(3)                | 41(2)                                | 0.0005  |
| Below 200% poverty<br>level                  | 3316(30)      | 1973(27)              | 1343(52)                             | <0.0001 |
| Marital Status                               |               |                       |                                      |         |
| Married                                      | 5297(66)      | 4124(68)              | 1173(48)                             |         |
| Widowed                                      | 710(5)        | 509(5)                | 201(6)                               |         |
| Divorced                                     | 803(10)       | 541(9)                | 262(11)                              |         |
| Single                                       | 2164(19)      | 1113(17)              | 1051(35)                             | <0.0001 |
| BMI (kg/m <sup>2</sup> )                     | 28 $\pm$ 0.1  | 28 $\pm$ 0.1          | 30 $\pm$ 0.2                         | <0.0001 |
| SBP (mmHg)                                   | 122 $\pm$ 0.4 | 122 $\pm$ 0.4         | 125 $\pm$ 0.5                        | <0.0001 |
| DBP(mmHg)                                    | 72 $\pm$ 0.2  | 72 $\pm$ 0.3          | 73 $\pm$ 0.4                         | 0.02    |

Data is presented as means  $\pm$  SE, or number (weighted %)

**Supplemental Table 3a: Hazard ratios and 95% confidence intervals of various outcomes associated with African American vs. white race in a propensity matched cohort of 937,560 patients.**

|               | <b>Overall</b>        | <b>eGFR<math>\geq</math>60 throughout follow-up</b> | <b>Incident eGFR<math>&lt;</math>60 during follow-up</b> |  |
|---------------|-----------------------|-----------------------------------------------------|----------------------------------------------------------|--|
|               | Hazard Ratio (95% CI) |                                                     |                                                          |  |
| Mortality     | 0.86 (0.85 - 0.87)    | 0.83 (0.82 - 0.84)                                  | 0.99 (0.96 - 1.01)                                       |  |
| Stroke        | 1.09 (1.06 - 1.12)    | 1.05 (1.02 - 1.09)                                  | 1.17 (1.1 - 1.24)                                        |  |
| CHD Composite | 0.68 (0.66 - 0.7)     | 0.63 (0.61 - 0.65)                                  | 0.79 (0.75 - 0.84)                                       |  |
| AMI           | 0.75 (0.72 - 0.77)    | 0.69 (0.67 - 0.72)                                  | 0.87 (0.81 - 0.93)                                       |  |
| CABG          | 0.47 (0.44 - 0.5)     | 0.44 (0.41 - 0.48)                                  | 0.55 (0.47 - 0.63)                                       |  |
| PCI           | 0.63 (0.6 - 0.67)     | 0.6 (0.57 - 0.64)                                   | 0.67 (0.6 - 0.76)                                        |  |

  

| <b>Overall</b> |                 |                    |                    |                    |
|----------------|-----------------|--------------------|--------------------|--------------------|
|                | White/no CHD    | AA/ no CHD         | white/CHD          | AA/CHD             |
| Mortality      | 1.00 (referent) | 0.84 (0.83 - 0.85) | 3.16 (3.04 - 3.28) | 3.69 (3.53 - 3.86) |
| Stroke         | 1.00 (referent) | 1.09 (1.06 - 1.13) | 4.7 (4.32 - 5.12)  | 5.15 (4.64 - 5.7)  |

  

| <b>eGFR<math>\geq</math>60 throughout follow-up</b> |                 |                   |                    |                    |
|-----------------------------------------------------|-----------------|-------------------|--------------------|--------------------|
|                                                     | White/no CHD    | AA/ no CHD        | white/CHD          | AA/CHD             |
| Mortality                                           | 1.00 (referent) | 0.81 (0.8 - 0.82) | 3.09 (2.95 - 3.24) | 3.53 (3.33 - 3.74) |
| Stroke                                              | 1.00 (referent) | 1.06 (1.02 - 1.1) | 4.42 (3.97 - 4.92) | 4.93 (4.32 - 5.63) |

  

| <b>Incident eGFR<math>&lt;</math>60 during follow-up</b> |                 |                    |                    |                    |
|----------------------------------------------------------|-----------------|--------------------|--------------------|--------------------|
|                                                          | White/no CHD    | AA/ no CHD         | white/CHD          | AA/CHD             |
| Mortality                                                | 1.00 (referent) | 0.98 (0.95 - 1)    | 2.27 (2.11 - 2.44) | 2.55 (2.37 - 2.76) |
| Stroke                                                   | 1.00 (referent) | 1.16 (1.08 - 1.24) | 3.06 (2.56 - 3.65) | 3.22 (2.66 - 3.89) |

  

| <b>Overall</b> |                 |                    |                    |                    |
|----------------|-----------------|--------------------|--------------------|--------------------|
|                | White/no stroke | AA/ no stroke      | white/ stroke      | AA/ stroke         |
| Mortality      | 1.00 (referent) | 0.83 (0.82 - 0.84) | 3.95 (3.8 - 4.11)  | 4.23 (4.07 - 4.39) |
| CHD            | 1.00 (referent) | 0.65 (0.63 - 0.67) | 6.33 (5.82 - 6.88) | 3.69 (3.33 - 4.09) |

  

| <b>eGFR<math>\geq</math>60 throughout follow-up</b> |                 |                    |                    |                    |
|-----------------------------------------------------|-----------------|--------------------|--------------------|--------------------|
|                                                     | White/no CHD    | AA/ no CHD         | white/CHD          | AA/CHD             |
| Mortality                                           | 1.00 (referent) | 0.80 (0.79 - 0.81) | 4.18 (3.98 - 4.39) | 4.37 (4.17 - 4.59) |
| CHD                                                 | 1.00 (referent) | 0.61 (0.59 - 0.63) | 4.42 (3.97 - 4.92) | 4.93 (4.32 - 5.63) |

  

| <b>Incident eGFR<math>&lt;</math>60 during follow-up</b> |                 |                    |                    |                    |
|----------------------------------------------------------|-----------------|--------------------|--------------------|--------------------|
|                                                          | White/no CHD    | AA/ no CHD         | white/CHD          | AA/CHD             |
| Mortality                                                | 1.00 (referent) | 0.97 (0.94 - 0.99) | 2.32 (2.15 - 2.51) | 2.48 (2.32 - 2.66) |

---

|     |                 |                    |                    |                    |
|-----|-----------------|--------------------|--------------------|--------------------|
| CHD | 1.00 (referent) | 0.76 (0.71 - 0.82) | 4.04 (3.41 - 4.79) | 2.26 (1.85 - 2.75) |
|-----|-----------------|--------------------|--------------------|--------------------|

---

CHD, coronary heart disease; AMI; acute myocardial infarction; CABG, coronary artery nypass grafting; PCI, percutaneous coronary intervention



**Supplemental Table 3b: Hazard ratios and 95% confidence intervals of various outcomes associated with African American vs. white race in select subgroups of a propensity matched cohort of 937,560 patients**

|                  | <b>All-cause Mortality</b> | <b>Incident ischemic strokes</b> | <b>Incident CHD Composite</b> |
|------------------|----------------------------|----------------------------------|-------------------------------|
|                  | Hazard Ratio (95% CI)      |                                  |                               |
| Age < 40         | 0.72 (0.67 - 0.78)         | 1.18 (0.98 - 1.43)               | 0.98 (0.82 - 1.18)            |
| Age 40-59        | 0.71 (0.7 - 0.73)          | 0.96 (0.93 - 0.99)               | 0.58 (0.56 - 0.6)             |
| Age 60-79        | 0.98 (0.97 - 1)            | 1.21 (1.15 - 1.26)               | 0.76 (0.72 - 0.8)             |
| Age ≥ 80         | 1.06 (1.04 - 1.09)         | 1.61 (1.41 - 1.83)               | 1.18 (1.02 - 1.37)            |
| Male             | 0.87 (0.86 - 0.88)         | 1.1 (1.07 - 1.13)                | 0.68 (0.66 - 0.7)             |
| Female           | 0.55 (0.52 - 0.59)         | 1.04 (0.91 - 1.19)               | 0.68 (0.58 - 0.8)             |
| CHD              | 1.02 (0.99 - 1.04)         | 1.15 (1.07 - 1.23)               | -                             |
| No CHD           | 0.84 (0.83 - 0.85)         | 1.08 (1.05 - 1.12)               | -                             |
| CHF              | 0.94 (0.92 - 0.97)         | 1.32 (1.2 - 1.45)                | 0.89 (0.8 - 0.99)             |
| No CHF           | 0.84 (0.83 - 0.85)         | 1.07 (1.04 - 1.1)                | 0.66 (0.65 - 0.68)            |
| DM               | 0.91 (0.89 - 0.92)         | 1.12 (1.08 - 1.17)               | 0.63 (0.6 - 0.65)             |
| No DM            | 0.83 (0.82 - 0.84)         | 1.07 (1.04 - 1.11)               | 0.72 (0.69 - 0.74)            |
| HTN              | 0.88 (0.87 - 0.89)         | 1.1 (1.07 - 1.13)                | 0.68 (0.66 - 0.7)             |
| No HTN           | 0.78 (0.76 - 0.8)          | 1.06 (1 - 1.13)                  | 0.67 (0.63 - 0.72)            |
| eGFR <90         | 0.84 (0.83 - 0.85)         | 1.14 (1.09 - 1.18)               | 0.71 (0.68 - 0.74)            |
| eGFR ≥ 90        | 0.85 (0.84 - 0.87)         | 1.02 (0.98 - 1.06)               | 0.63 (0.61 - 0.66)            |
| Income < \$22000 | 0.9 (0.89 - 0.92)          | 1.15 (1.11 - 1.19)               | 0.72 (0.69 - 0.74)            |
| Income ≥ \$22000 | 0.77 (0.75 - 0.78)         | 0.99 (0.95 - 1.04)               | 0.62 (0.59 - 0.64)            |

eGFR, estimated glomerular filtration rate; DM, diabetes mellitus; CHD, coronary heart disease;

CHF, chronic heart failure; HTN, hypertension.

**Supplemental Table 4.** Incident coronary heart disease and incident stroke outcomes associated with African American race in Cox models censored for mortality and in competing risk regression models.

|                     | <b>Primary events (N, %)</b> | <b>Competing events (deaths; N, %)</b> | <b>HR (95%CI)</b><br>–<br><b>censored for all-cause deaths</b> | <b>SHR (95%CI)</b><br>–<br><b>competing risk all-cause deaths</b> |
|---------------------|------------------------------|----------------------------------------|----------------------------------------------------------------|-------------------------------------------------------------------|
| <b>Unmatched</b>    |                              |                                        |                                                                |                                                                   |
| Incident CHD events | 63,808 (2.3)                 | 507,795 (18.7)                         | 0.70 (0.69-0.71)                                               | 0.78 (0.76-0.80)                                                  |
| Incident stroke     | 59,734 (2.1)                 | 545,562 (19.0)                         | 1.18 (1.16-1.21)                                               | 1.23 (1.21-1.26)                                                  |
| <b>Matched</b>      |                              |                                        |                                                                |                                                                   |
| Incident CHD events | 19,115 (2.3)                 | 130,918 (15.0)                         | 0.63 (0.55-0.72)                                               | 0.69 (0.67-0.71)                                                  |
| Incident stroke     | 21,304 (2.4)                 | 131,373 (15.0)                         | 1.09 (1.06-1.12)                                               | 1.12 (1.09-1.15)                                                  |

Primary events represent incident CHD events or incident stroke events, respectively. Competing events are all-cause deaths for both primary events. HR, hazard ratio; SHR, sub-hazard ratio

## Supplemental Figure legends

**Supplemental Figure 1.** Association of African-American race with all-cause mortality in patients with  $eGFR \geq 60$  ml/min/1.73m<sup>2</sup> throughout follow-up (N=2,732,494).

Panel A shows association of African-American race with all-cause mortality, with various adjustments for baseline characteristics. Patients with white race served as referent. Panel B shows associations of race with all-cause mortality in patients with and without an incident coronary heart disease event. Coronary heart disease events were entered in the models as time dependent covariates, and models were estimated by including multiplicative interaction terms between race and incident coronary heart disease events. Patients with white race and no incident coronary heart disease events served as referent. Panel C shows associations of race with all-cause mortality in patients with and without an incident stroke event. Stroke events were entered in the models as time dependent covariates, and models were estimated by including multiplicative interaction terms between race and incident stroke events. Patients with white race and no incident stroke events served as referent.

Model 1: unadjusted, Model 2: adjusted for age, gender, baseline estimated glomerular filtration rate; Model 3: adjusted for Model 2 variables plus comorbidities; Model 4: adjusted for Model 3 variables plus baseline body mass index, systolic and diastolic blood pressure; Model 5: adjusted for Model 4 variables plus mean income, marital status, service connectedness, area-level housing stress, low education, low employment and persistent poverty, frequency of VA healthcare encounters, use of angiotensin converting enzyme inhibitors/angiotensin receptor blockers and statins, and receipt of influenza vaccination(s), and an indicator of each patient's VA healthcare center.

AA: African-American; CHD: coronary heart disease

**Supplemental Figure 2.** Association of African-American race with all-cause mortality in patients with incident eGFR <60 ml/min/1.73m<sup>2</sup> (N=328,221).

Panel A shows association of African-American race with all-cause mortality, with various adjustments for baseline characteristics. Patients with white race served as referent. Panel B shows associations of race with all-cause mortality in patients with and without an incident coronary heart disease event. Coronary heart disease events were entered in the models as time dependent covariates, and models were estimated by including multiplicative interaction terms between race and incident coronary heart disease events. Patients with white race and no incident coronary heart disease events served as referent. Panel C shows associations of race with all-cause mortality in patients with and without an incident stroke event. Stroke events were entered in the models as time dependent covariates, and models were estimated by including multiplicative interaction terms between race and incident stroke events. Patients with white race and no incident stroke events served as referent.

Model 1: unadjusted, Model 2: adjusted for age, gender, baseline estimated glomerular filtration rate; Model 3: adjusted for Model 2 variables plus comorbidities; Model 4: adjusted for Model 3 variables plus baseline body mass index, systolic and diastolic blood pressure; Model 5: adjusted for Model 4 variables plus mean income, marital status, service connectedness, area-level housing stress, low education, low employment and persistent poverty, frequency of VA healthcare encounters, use of angiotensin converting enzyme inhibitors/angiotensin receptor blockers and statins, and receipt of influenza vaccination(s), and an indicator of each patient's VA healthcare center.

AA: African-American; CHD: coronary heart disease

**Supplemental Figure 3.** Panel A: Association of African-American race with incident coronary heart disease and with incident acute myocardial infarctions, coronary artery bypass grafting and percutaneous coronary interventions in patients with  $eGFR \geq 60$  ml/min/1.73m<sup>2</sup> throughout follow-up. Patients with white race served as referent. Panel B: Associations of race with incident coronary heart disease in patients with and without an incident stroke event, and with  $eGFR \geq 60$  ml/min/1.73m<sup>2</sup> throughout follow-up. Stroke events were entered in the models as time dependent covariates, and models were estimated by including multiplicative interaction terms between race and incident stroke events. Patients with white race and no incident stroke events served as referent.

Model 1: unadjusted, Model 2: adjusted for age, gender, baseline estimated glomerular filtration rate; Model 3: adjusted for Model 2 variables plus comorbidities; Model 4: adjusted for Model 3 variables plus baseline body mass index, systolic and diastolic blood pressure; Model 5: adjusted for Model 4 variables plus mean income, marital status, service connectedness, area-level housing stress, low education, low employment and persistent poverty, frequency of VA healthcare encounters, use of angiotensin converting enzyme inhibitors/angiotensin receptor blockers and statins, and receipt of influenza vaccination(s), and an indicator of each patient's VA healthcare center.

AA: African-American

**Supplemental Figure 4.** Panel A: Association of African-American race with incident coronary heart disease and with incident acute myocardial infarctions, coronary artery bypass grafting and percutaneous coronary interventions in patients with incident  $eGFR < 60$  ml/min/1.73m<sup>2</sup>. Patients with white race served as referent. Panel B: Associations of race with incident coronary heart

disease in patients with and without an incident stroke event, and with incident eGFR <60 ml/min/1.73m<sup>2</sup>. Stroke events were entered in the models as time dependent covariates, and models were estimated by including multiplicative interaction terms between race and incident stroke events. Patients with white race and no incident stroke events served as referent.

Model 1: unadjusted, Model 2: adjusted for age, gender, baseline estimated glomerular filtration rate; Model 3: adjusted for Model 2 variables plus comorbidities; Model 4: adjusted for Model 3 variables plus baseline body mass index, systolic and diastolic blood pressure; Model 5: adjusted for Model 4 variables plus mean income, marital status, service connectedness, area-level housing stress, low education, low employment and persistent poverty, frequency of VA healthcare encounters, use of angiotensin converting enzyme inhibitors/angiotensin receptor blockers and statins, and receipt of influenza vaccination(s), and an indicator of each patient's VA healthcare center.

AA: African-American

**Supplemental Figure 5. Panel A:** Association of African-American race with incident ischemic strokes in patients with eGFR  $\geq 60$  ml/min/1.73m<sup>2</sup> throughout follow-up. Patients with white race served as referent. **Panel B:** Associations of race with incident stroke in patients with and without an incident coronary heart disease event, and with eGFR  $\geq 60$  ml/min/1.73m<sup>2</sup> throughout follow-up. Coronary heart disease events were entered in the models as time dependent covariates, and models were estimated by including multiplicative interaction terms between race and incident coronary heart disease events. Patients with white race and no incident coronary heart disease events served as referent.

Model 1: unadjusted, Model 2: adjusted for age, gender, baseline estimated glomerular filtration rate; Model 3: adjusted for Model 2 variables plus comorbidities; Model 4: adjusted for Model 3 variables plus baseline body mass index, systolic and diastolic blood pressure; Model 5: adjusted for Model 4 variables plus mean income, marital status, service connectedness, area-level housing stress, low education, low employment and persistent poverty, frequency of VA healthcare encounters, use of angiotensin converting enzyme inhibitors/angiotensin receptor blockers and statins, and receipt of influenza vaccination(s), and an indicator of each patient's VA healthcare center.

AA: African-American

**Supplemental Figure 6.** Panel A: Association of African-American race with incident ischemic strokes in patients with incident eGFR  $<60$  ml/min/1.73m<sup>2</sup>. Patients with white race served as referent. Panel B: Associations of race with incident stroke in patients with and without an incident coronary heart disease event, and with incident eGFR  $<60$  ml/min/1.73m<sup>2</sup>. Coronary heart disease events were entered in the models as time dependent covariates, and models were estimated by including multiplicative interaction terms between race and incident coronary heart disease events. Patients with white race and no incident coronary heart disease events served as referent.

Model 1: unadjusted, Model 2: adjusted for age, gender, baseline estimated glomerular filtration rate; Model 3: adjusted for Model 2 variables plus comorbidities; Model 4: adjusted for Model 3 variables plus baseline body mass index, systolic and diastolic blood pressure; Model 5: adjusted for Model 4 variables plus mean income, marital status, service connectedness, area-level housing stress, low education, low employment and persistent poverty, frequency of VA

healthcare encounters, use of angiotensin converting enzyme inhibitors/angiotensin receptor blockers and statins, and receipt of influenza vaccination(s), and an indicator of each patient's VA healthcare center.

AA: African-American



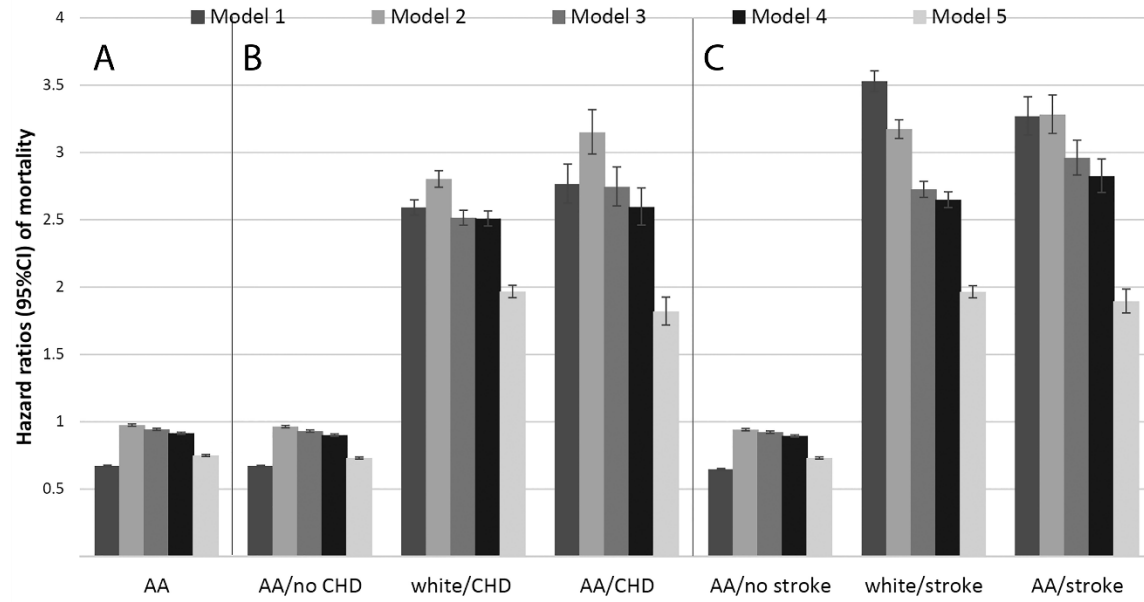

**Supplemental Figure 1**

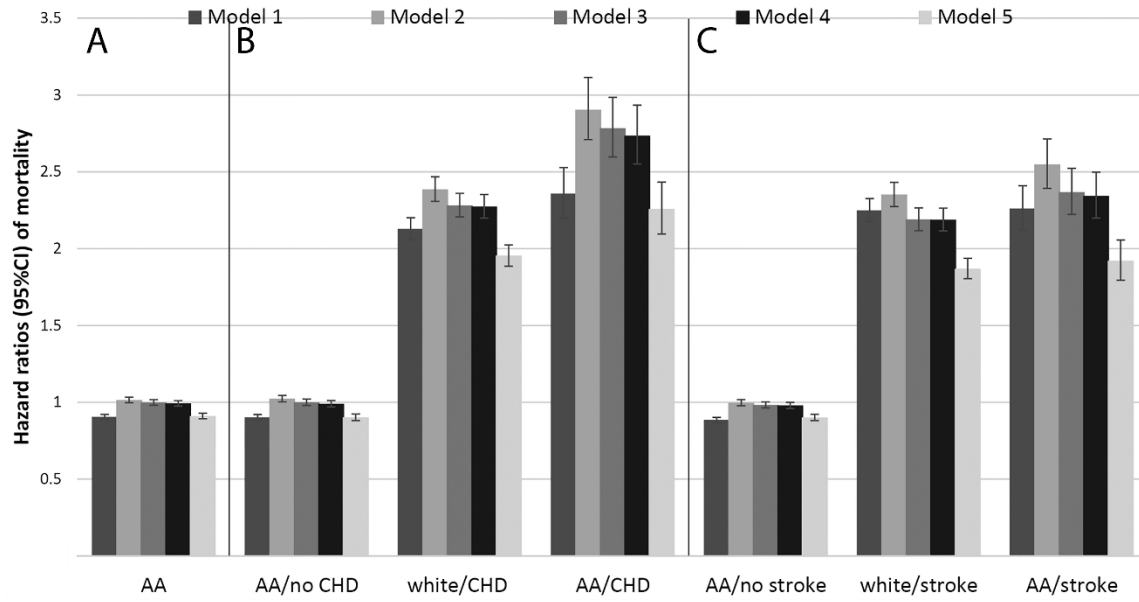

**Supplemental Figure 2**

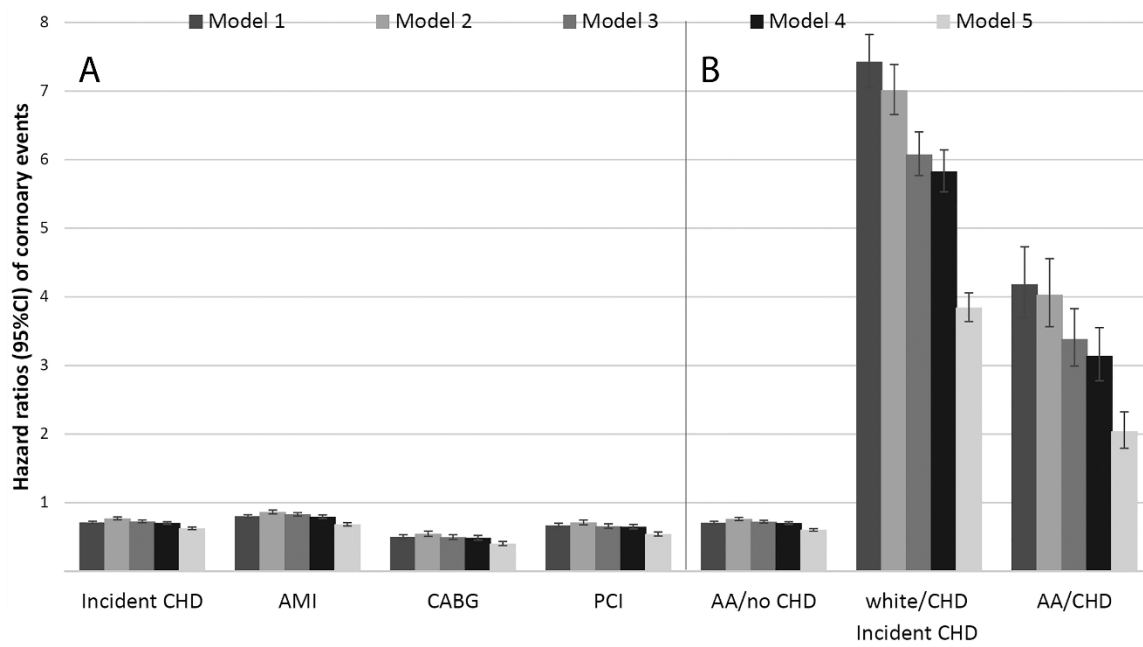

**Supplemental Figure 3**

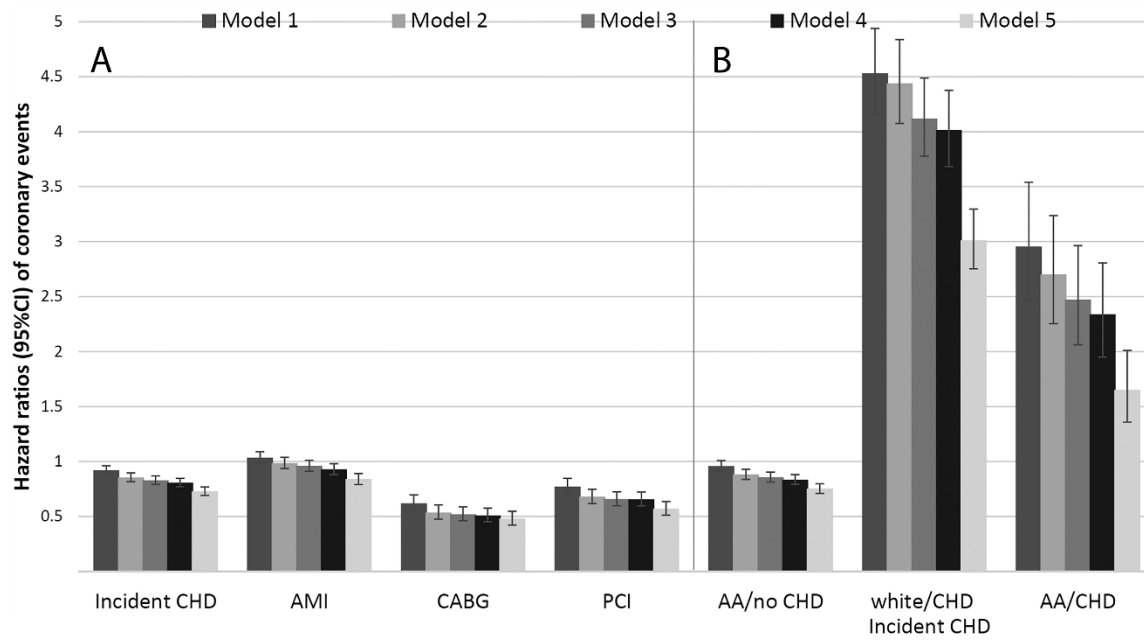

**Supplemental Figure 4**

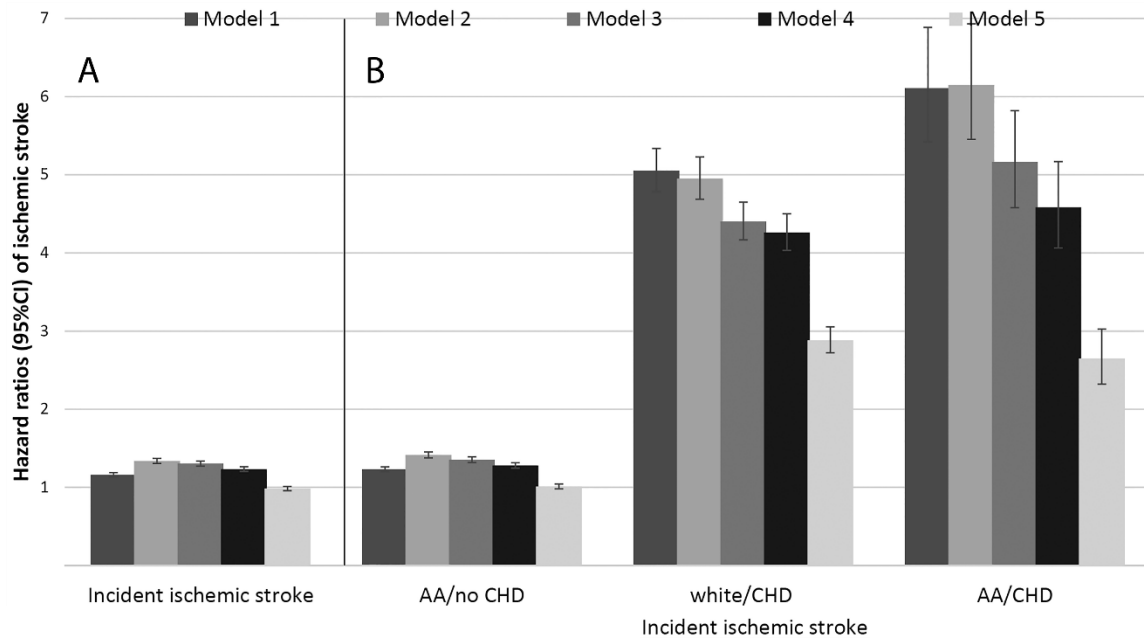

**Supplemental Figure 5**

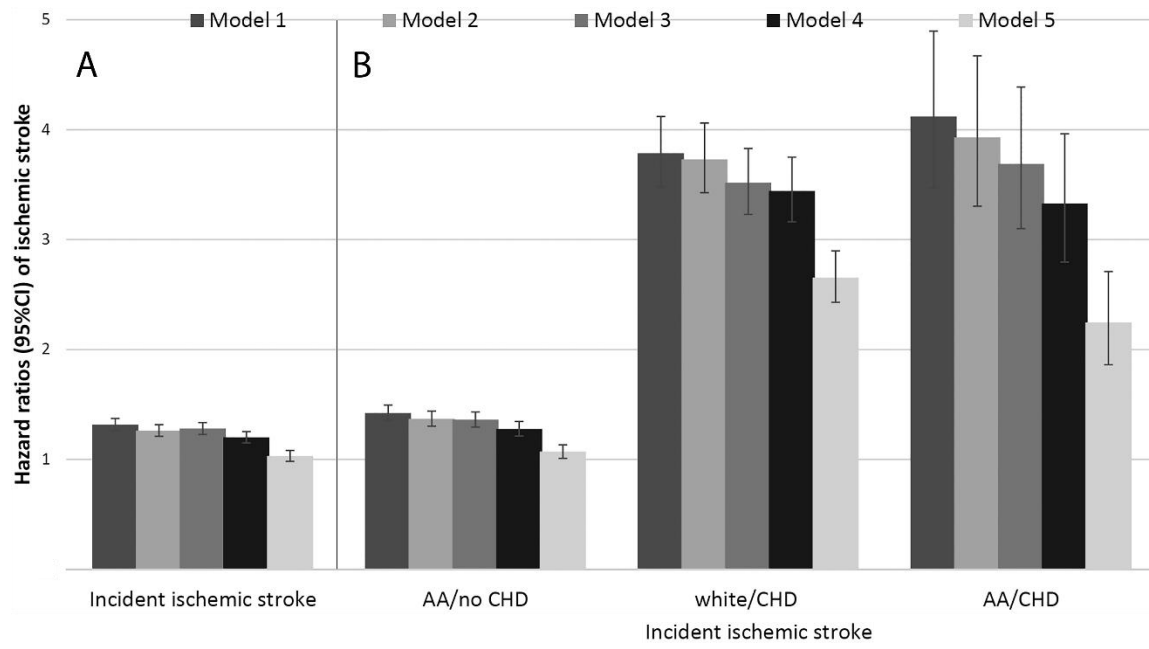

**Supplemental Figure 6**
